# Supplementary material for: One pot synthesis of ilmenite-type NiMnO3–“nitrogen-doped” graphene nanocomposite as next generation supercapacitors
Source: Royal Society of Chemistry journal article supplement (doi:10.1039/c3dt51807h), 2013-01-01
Supplement: c3dt51807h.pdf [file c3dt51807h.pdf]

## Supporting Information

### One Pot synthesis of Ilmenite-Type $\text{NiMnO}_3$ /"Nitrogen-Doped" Graphene nanocomposites as Next Generation Supercapacitors

Soumen Giri, Debasis ghosh and Chapal Kumar Das\*

*Materials Science Centre, Indian Institute of Technology Kharagpur,*

*Kharagpur, 721302, India, Fax: (+91) 3222 255303,*

*E-mail: [chapal12@yahoo.co.in](mailto:chapal12@yahoo.co.in)*

1.

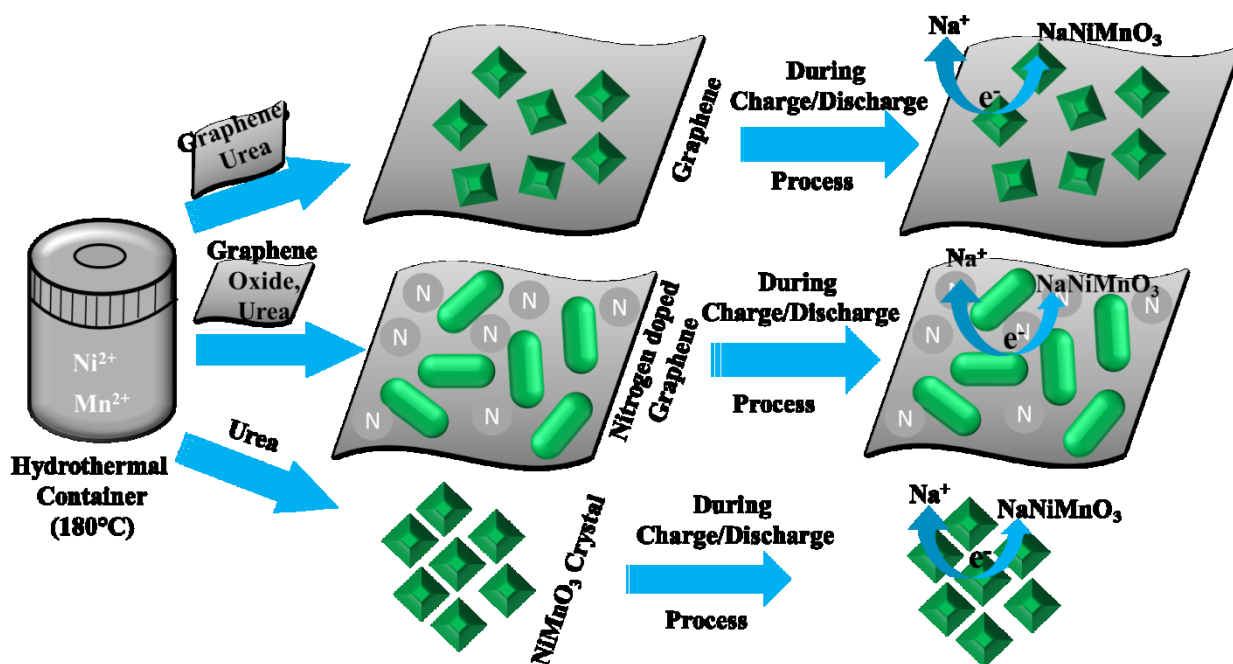

**Scheme 1:** First step represents the different crystal shape formed with the presence of graphene and graphene oxide and second step represents the proposed charge/discharge mechanism when  $\text{Na}_2\text{SO}_4$  were used as electrolyte.

Electrochemical characterizations were carried out by a three electrode system. At first, the electrode was fabricated according to the following procedure. 1.0 mg of as prepared composites was dispersed in 1 ml of 1% nafion solution by sonication. After that, the solution was cast onto a glassy carbon electrode with diameter of 3 mm which was used as the working electrode. The electrode was fully dried before electrochemical characterization. Platinum wire and saturated calomel electrode were used as counter and reference electrode, respectively. Cyclic voltammetry and charge discharge test were carried out within the potential range of 0-0.8V. Electrochemical impedance spectroscopy (EIS) was also tested within the frequency range of  $10^6$  (initial) and 0.1 (final) Hz.

## 2. XRD Analysis

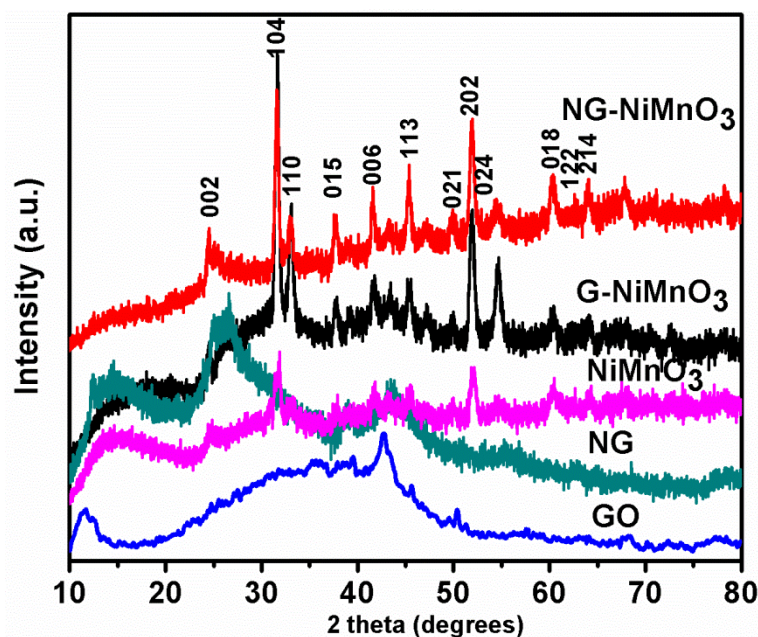

Fig. S1: XRD analysis of the as prepared composites

## 3. FTIR and Raman Analysis

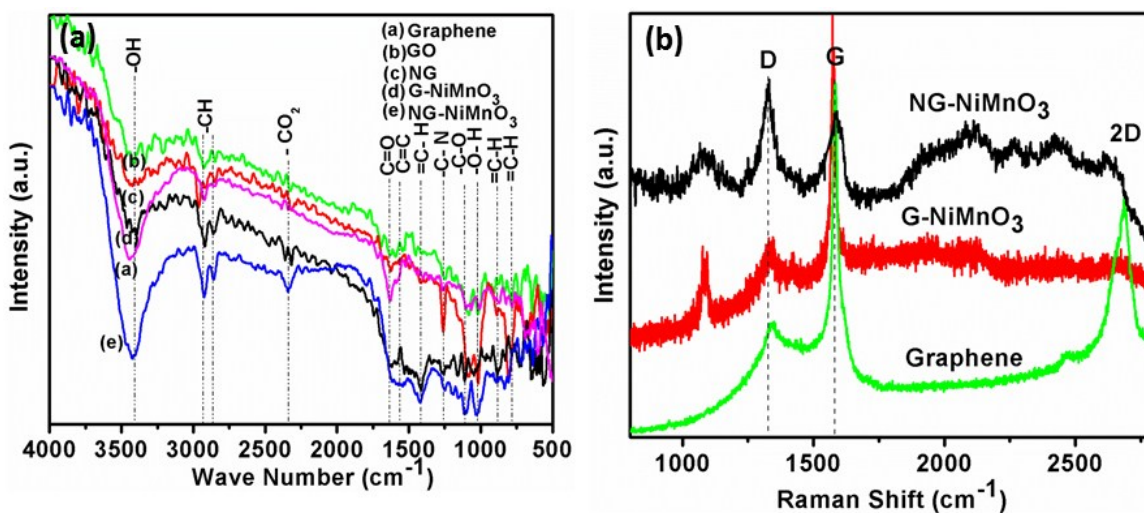

**Fig. S2:** (a) FTIR and (b) Raman spectroscopy of composites.

The FTIR spectra of all the samples show the presence of  $\text{-OH}$  ( $3421\text{ cm}^{-1}$ ),  $\text{C=O}$  ( $1626\text{ cm}^{-1}$ ) and phenol or alcohol or ether ( $1063\text{ cm}^{-1}$ ). It shows the decreased intensity of the  $\text{C=O}$  bands (at  $1626\text{ cm}^{-1}$ ) and increased intensity of the  $\text{C-H}$  bands at  $2924\text{ cm}^{-1}$  and  $2854\text{ cm}^{-1}$  corresponding to stretch vibrations of the methylene group, indicates the reduction of graphene-COOH to hydroxymethylene group. The appearances of bands at  $2918\text{ cm}^{-1}$  and  $2852\text{ cm}^{-1}$  denote the stretching frequency of the  $\text{CH}_2$  group, while the band at  $1033\text{ cm}^{-1}$  indicates formation of the  $\text{C-N}$  bond.<sup>1</sup> Raman spectroscopy is one of the strong evidence to prove the nitrogen doping on graphene plane. As we can be seen the strong peaks appear at around  $1326.5\text{ cm}^{-1}$ ,  $1589.3\text{ cm}^{-1}$ ,  $2690.27\text{ cm}^{-1}$  for the D, G, and 2D band, respectively. The G band related to the double degenerate  $\text{E}_{2g}$  phonons at the brillouin zone centre, whereas 2D and D band related to the zone boundary phonons. First one is the resulted to the first order Raman scattering process, but second pair generate from the second order double resonance process. The peak appeared at  $1084.4\text{ cm}^{-1}$  may be due to the presence of  $\text{NiMnO}_3$  which is absent in the sole graphene. For nitrogen doping i.e. the substitution of nitrogen with carbon lattice of graphene induced the enhancement of defective site inside the graphene site. So, the nitrogen doped graphene/ $\text{NiMnO}_3$  composite shows the ( $I_D/I_G$ ) value of 4.9. It proves the defective sites were present in the system. In the addition, the doping level can also be calculated from ( $I_{2D}/I_G$ ) ratio. The ( $I_{2D}/I_G$ ) ratio of NG/ $\text{NiMnO}_3$  shows the value of 0.83 which means the doping level of nitrogen reached  $>2 \times 10^{13}\text{ cm}^{-2}$ .<sup>2</sup> So, huge number of nitrogen doping causes the improvement of graphene properties and expected to play a crucial role in the electrochemical performances.

#### 4. XPS Analysis

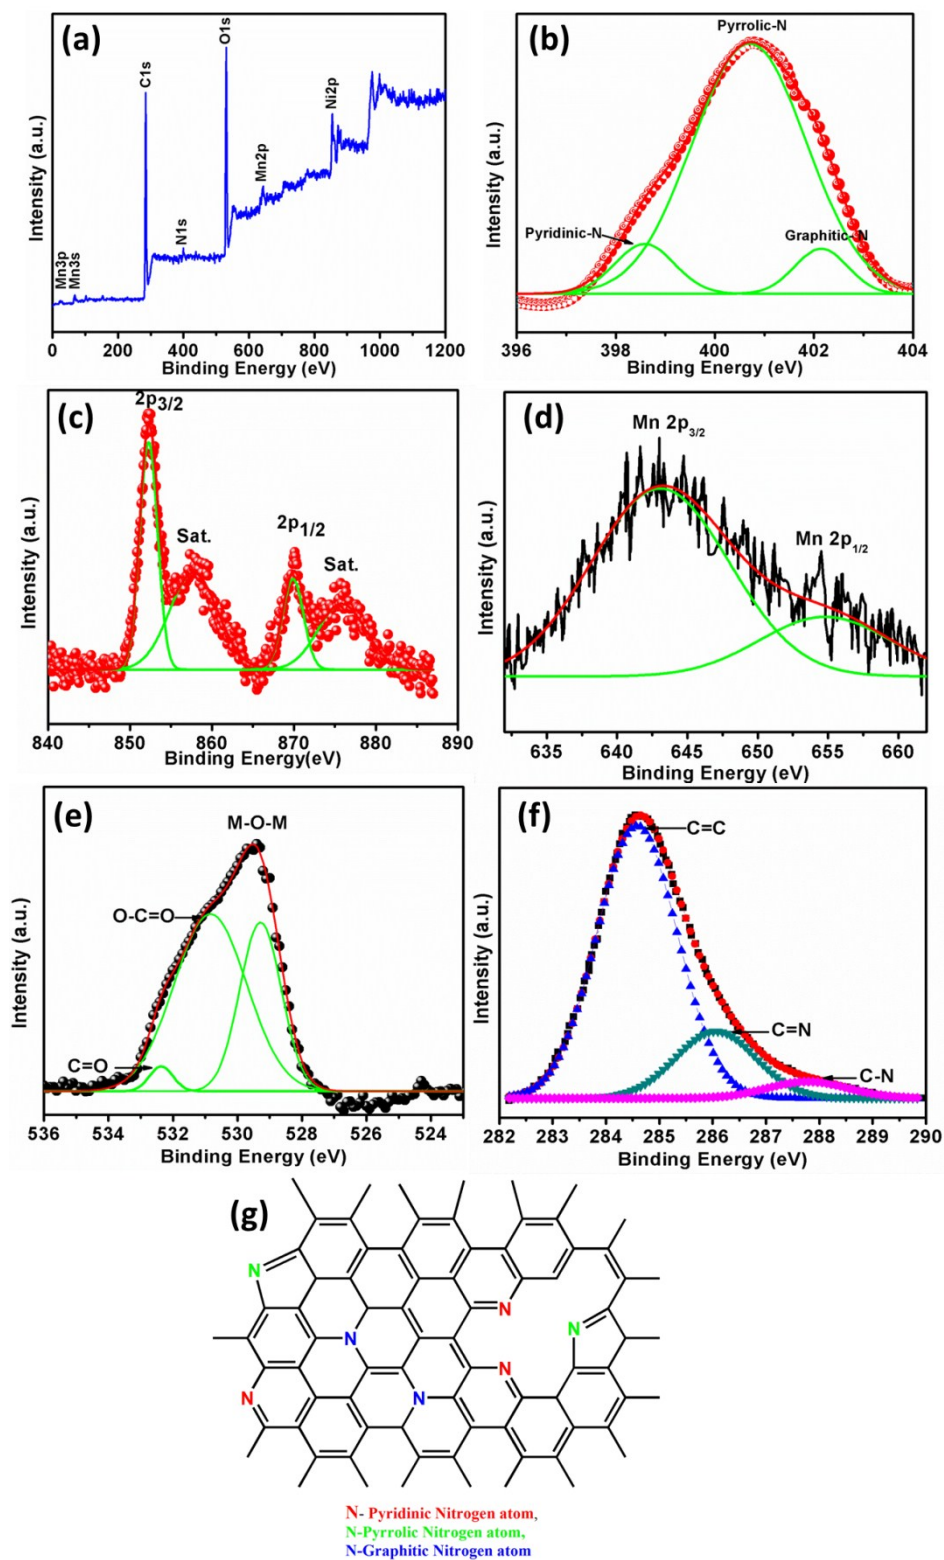

**Fig. S3:** XPS analysis of NG-NiMnO<sub>3</sub> composites (a) Survey (b) N1s (c) Ni2p (d) Mn2p (e) O1s (f) C1s (g) schematic structure of NG.

#### 4.TGA Analysis

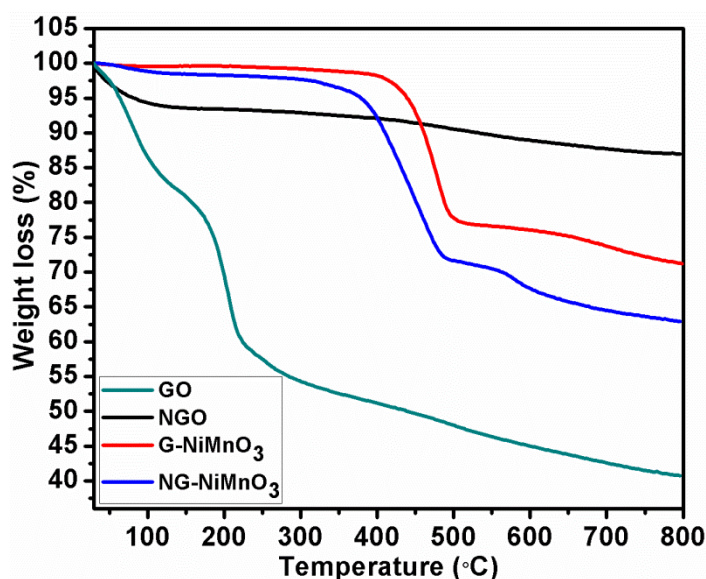

**Fig. S4.** TGA analysis of as prepared composites

Compared with other composites, the graphene oxide shows much lower thermal stability and onset temperature falls dramatically, may be due to the decomposition and vaporization of various oxygen containing functional groups. On the other hand, increased thermal stability of other composites indicates the removal of the thermally unstable functional groups such as -COOH, -OH, and epoxide groups of the GO sheets by reduction and incorporation of nitrogen in these labile sites. The presences of some functional group in the graphene surface lead to prevent the stacking and enhance the dispersibility of graphene. In addition, Metal ions first coordinate with these functional groups and anchored on to the graphene surface which may help to find out the position of reactive sites on the graphene surface.<sup>3</sup> From the TGA curves, three steps of weight loss are found. The first weight loss occurred upto 120°C, which is due to the removal of the physisorbed water. The large weight loss at about 400°C is attributed to the removal of reduced GO from the composites. The thermal stability of nitrogen doped graphene/NiMnO<sub>3</sub> is little bit less as compared with graphene/NiMnO<sub>3</sub>, it may be due to the presence of nitrogen inside the carbon lattice minimizes the interaction with bi-metal. Finally, between 550°C and 750°C the graphitic carbon burns off accounting for the third burn stage.<sup>4</sup>



## 5. FESEM and HRTEM Study

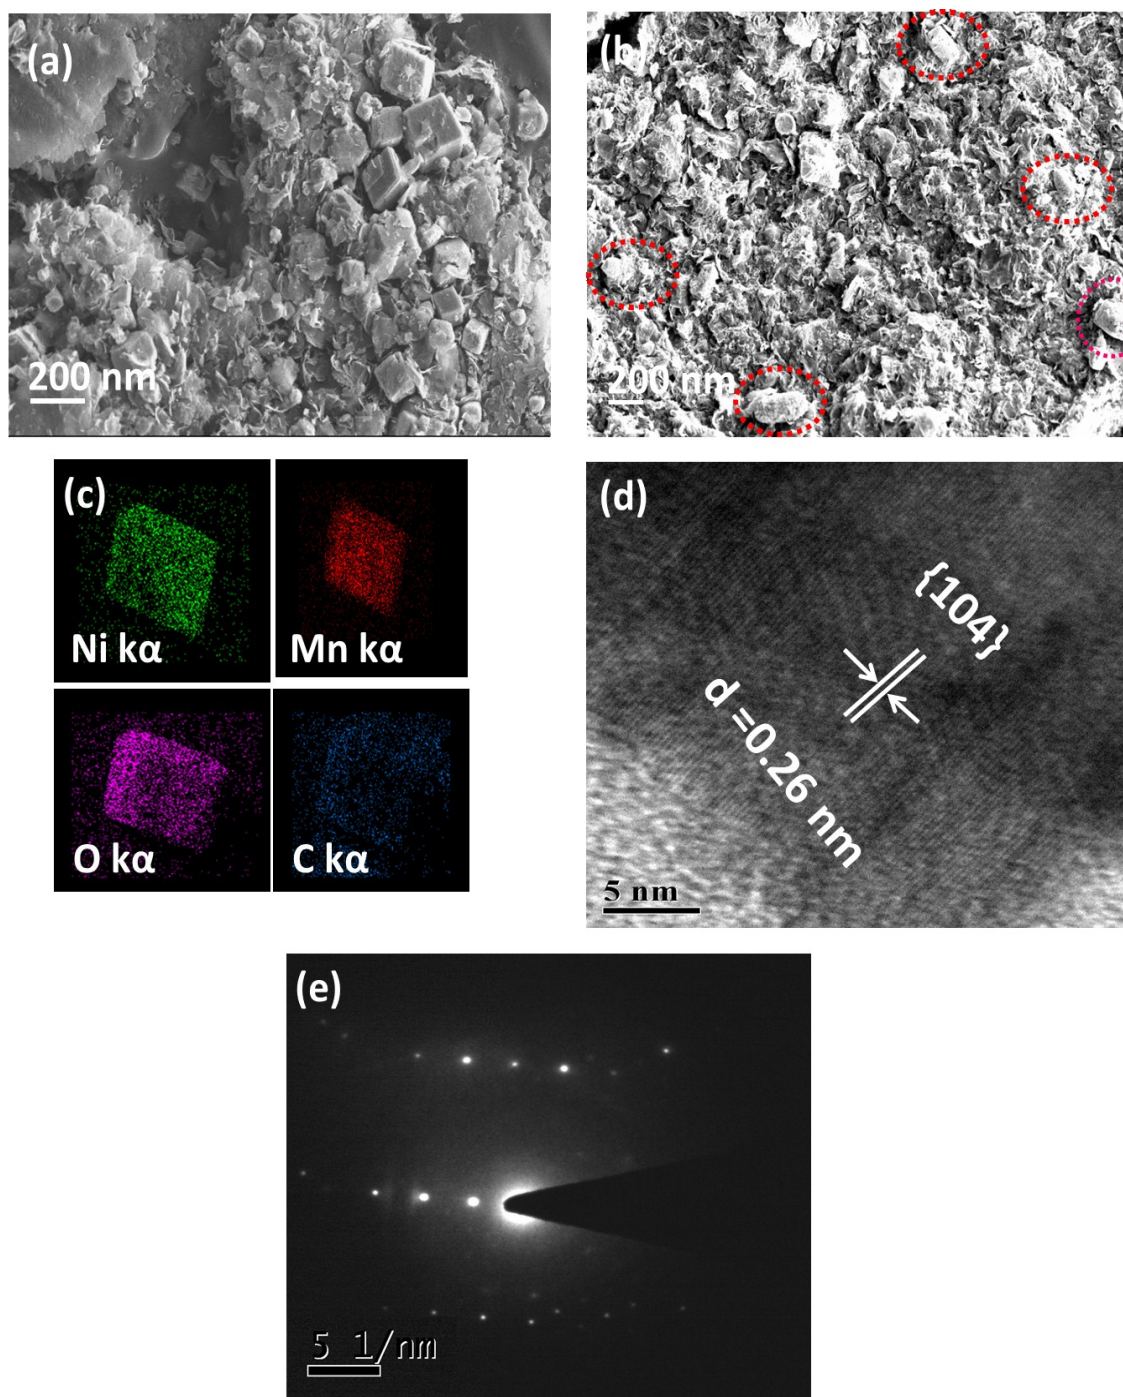

**Fig. S5:** SEM images of (a) G-NiMnO<sub>3</sub> and (b) NG-NiMnO<sub>3</sub>; (c) EDS mapping, (d) lattice fringes ( $d=0.26$  nm) and (e) SAED pattern of NiMnO<sub>3</sub> crystal.

## 6. Cyclic Voltammetry

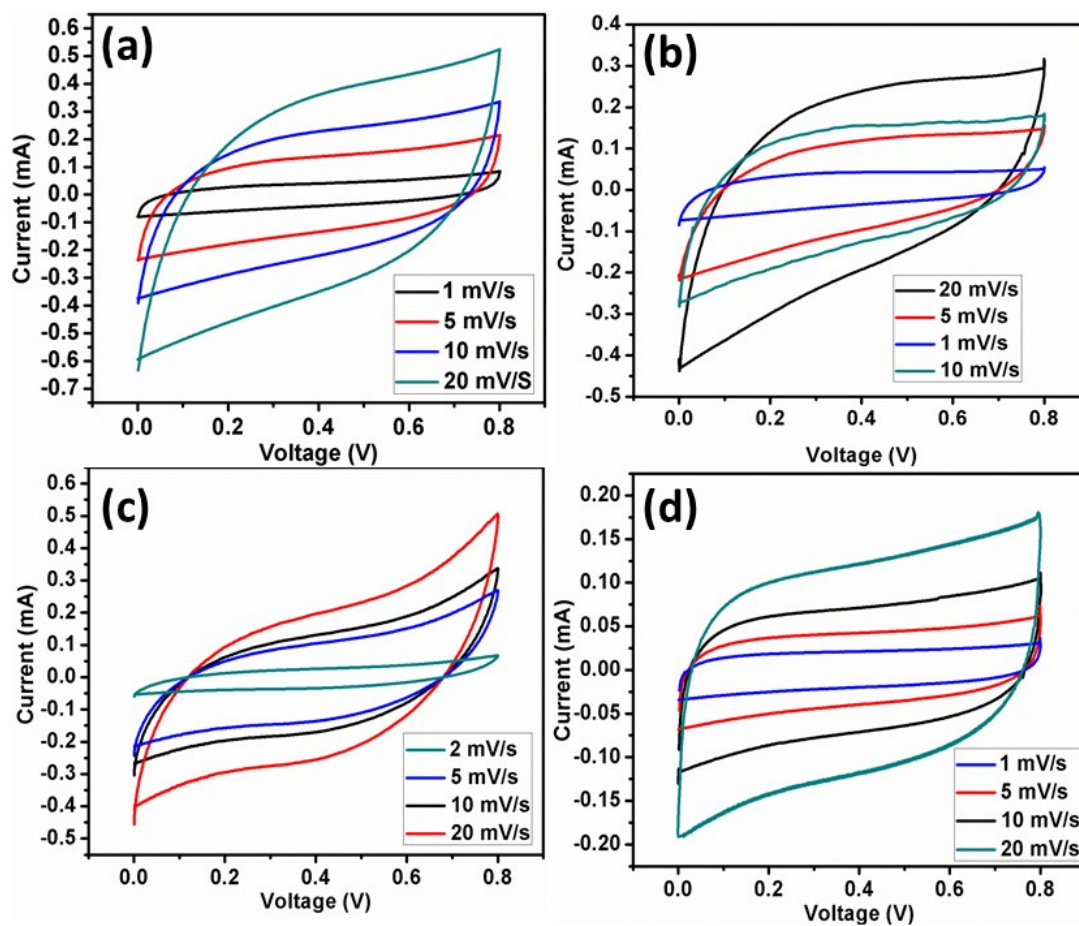

**Fig. S6:** Cyclic voltammetry of (a) NG-NiMnO<sub>3</sub>, (b) G-NiMnO<sub>3</sub>, (c) NG, and (d) NiMnO<sub>3</sub> at different scan rates.

## 7. Galvanostatic charge-discharge curve

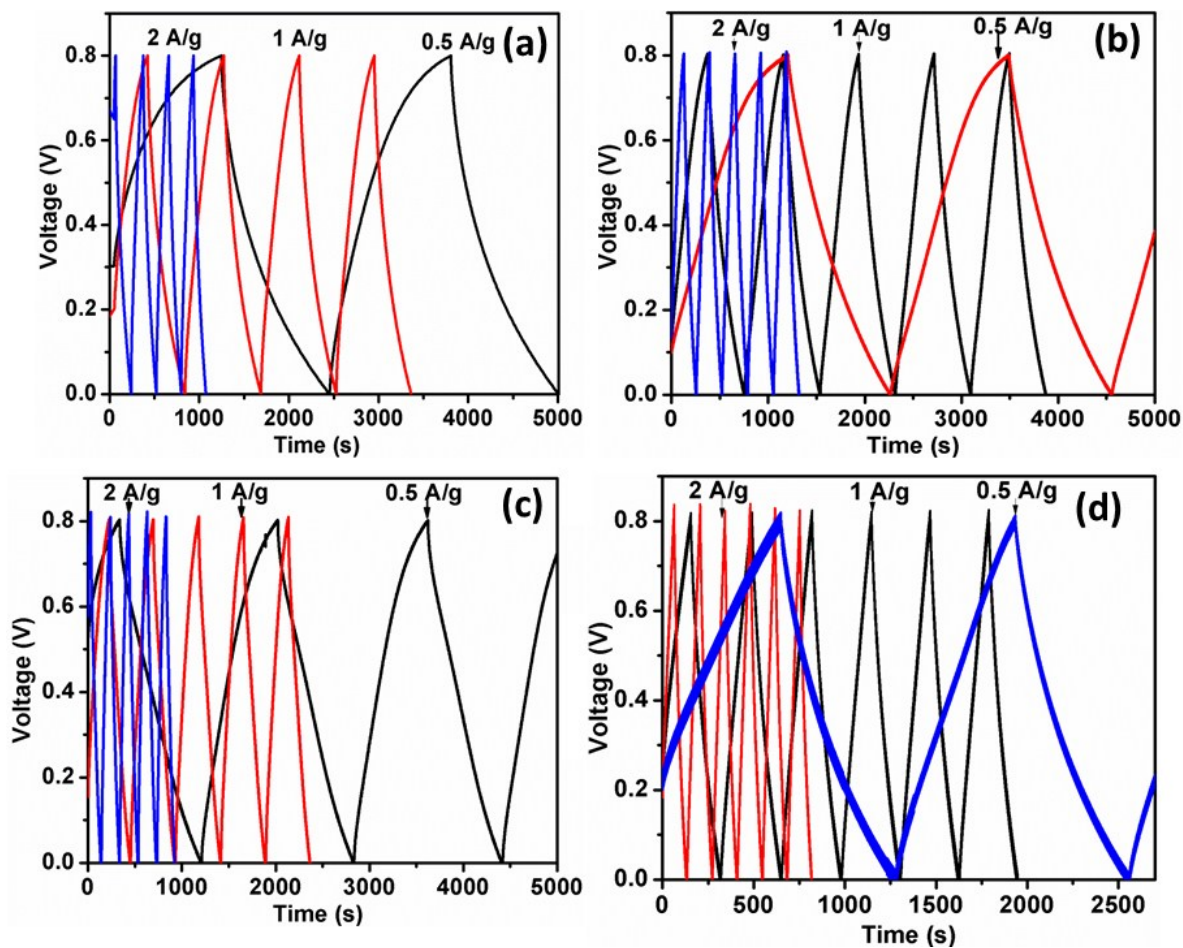

**Fig. S7:** Galvanostatic charge-discharge of (a) NG-NiMnO<sub>3</sub>, (b) G-NiMnO<sub>3</sub>, (c) NG, (d) NiMnO<sub>3</sub> at different current density.



8. Ragone plot and cyclic stability of all composites

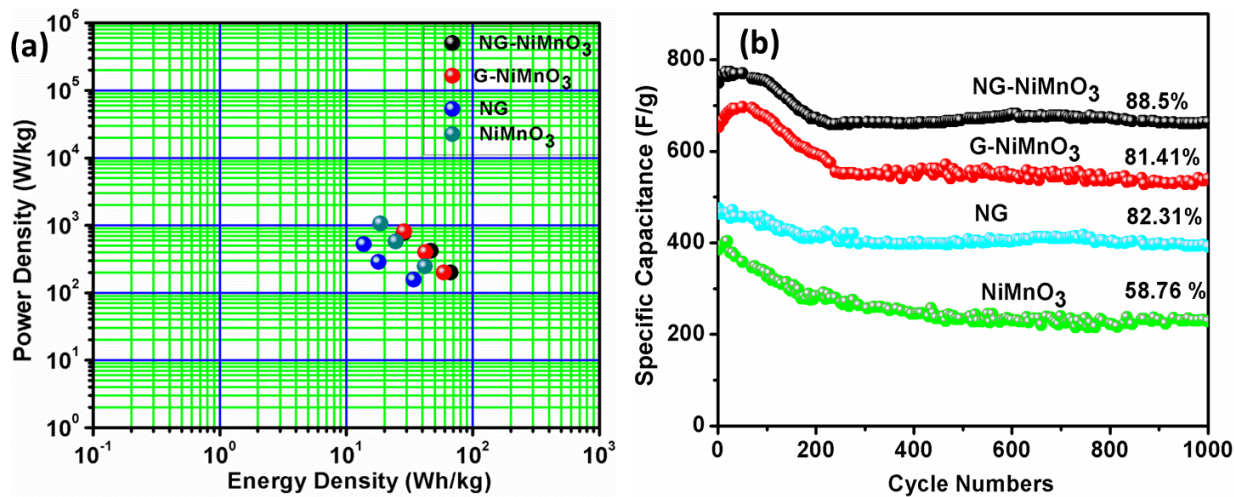

Fig.S8: (a) Ragone plot and (b) cyclic stability of all composites.

From the figure S8b, It is clearly shown the initially specific capacitance increases which is mainly due to electrode activation.

9. Tables

Table S1: Specific capacitance (F/g): Equation used for specific capacitance calculation

$$C_s = \frac{C}{m} = \frac{\int_{V_2}^{V_1} i(V) dV}{(V_1 - V_2)vm}$$

Where the term in the numerator, of above eq., represents the area of I-V curve and V<sub>1</sub>, V<sub>2</sub> are the switching potential in cyclic voltammetry and m is the mass (0.10 mg) of all composites

| Sample                | 1 mV/s | 5 mV/s | 10 mV/s | 20 mV/s |
|-----------------------|--------|--------|---------|---------|
| NG-NiMnO <sub>3</sub> | 750.2  | 500.6  | 375.2   | 281.25  |
| G-NiMnO <sub>3</sub>  | 677.5  | 357.5  | 240.5   | 175     |
| NiMnO <sub>3</sub>    | 388.75 | 150    | 134.5   | 60.2    |
| NG                    | 475    | 375    | 238.75  | 179.3   |

Table S2: Value obtained from suitable circuit fitting

Circuit:

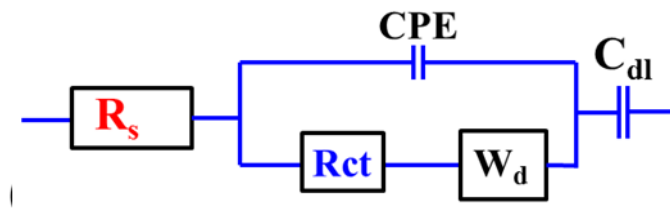

| Sample                | R <sub>s</sub> (Ω) | R <sub>ct</sub> (Ω) | CPE                      | a3    | W <sub>d</sub> (Ω) | C <sub>dl</sub>         |
|-----------------------|--------------------|---------------------|--------------------------|-------|--------------------|-------------------------|
| NG-NiMnO <sub>3</sub> | 3.18               | 28.56               | 0.325 x 10 <sup>-3</sup> | 0.95  | 5.3                | 5.54 x 10 <sup>-3</sup> |
| G-NiMnO <sub>3</sub>  | 34.48              | 190.3               | 0.246 x 10 <sup>-3</sup> | 0.474 | 24.3               | 4.63 x 10 <sup>-3</sup> |
| NG                    | 2.114              | 89.46               | 21.11 x 10 <sup>-6</sup> | 0.68  | 17.68              | 3.8 x 10 <sup>-3</sup>  |
| NiMnO <sub>3</sub>    | 36                 | 186                 | 0.237 x 10 <sup>-6</sup> | 0.737 | 9.81               | 0.171x10 <sup>-3</sup>  |

Table S3: Specific Capacitance (F/g) from GCD curve: Equation used for Specific capacitance calculation =  $I \times t / V \times m$ , Where  $\frac{I}{m}$  is the used current density, t is time for discharging, V is the potential window

| Sample                | 0.5 A/g | 1 A/g | 2 A/g  |
|-----------------------|---------|-------|--------|
| NG-NiMnO <sub>3</sub> | 749.2   | 523.5 | 320    |
| G-NiMnO <sub>3</sub>  | 666.2   | 476.5 | 322.5  |
| NiMnO <sub>3</sub>    | 386.19  | 203   | 155.17 |
| NG                    | 473     | 277.5 | 210.5  |

Table S4: Energy Density (Wh/kg)calculation=  $E = \frac{1}{2} C_s V^2$

$E$  is the energy density in Wh/kg,  $C_s$  is the specific capacitance obtained from CV measurements and  $V$  is the operating voltage range.

| Sample                | 0.5 A/g | 1 A/g | 2 A/g |
|-----------------------|---------|-------|-------|
| NG-NiMnO <sub>3</sub> | 66.59   | 46.53 | 28.44 |
| G-NiMnO <sub>3</sub>  | 59.21   | 42.35 | 28.66 |
| NiMnO <sub>3</sub>    | 34.28   | 18.04 | 13.79 |
| NG                    | 42.04   | 24.66 | 18.71 |

**Table S5: Power density (W/kg) calculation=  $P = E/t$ ,**

where  $P$  is the power density in W/kg,  $E$  is the energy density in Wh/kg and  $t$  is the time in hours.

| Sample                | 0.5 A/g | 1 A/g  | 2 A/g   |
|-----------------------|---------|--------|---------|
| NG-NiMnO <sub>3</sub> | 200.27  | 415.18 | 765.88  |
| G-NiMnO <sub>3</sub>  | 199.02  | 399.10 | 809.85  |
| NiMnO <sub>3</sub>    | 155.42  | 286.09 | 522.56  |
| NG                    | 244.89  | 576.46 | 1069.14 |

## References

1. K.-J. Huang, D.-J. Niu, J.-Y. Sun, C.-H. Han, Z.-W. Wu, Y. -L. Li, X.-Q. Xiong, *Colloids and Surfaces B: Biointerfaces*, 2011, **82**, 543.
2. A. Das , S. Pisana , B. Chakraborty , S. Piscanec , S. K. Saha , U. V. Waghmare , K. S. Novoselov , H. R. Krishnamurthy , A. K. Geim , A. C. Ferrari and A. K. Sood , *Nat. Nanotechnol.* 2008, **3**, 210.
3. J. Shen, M. Shi, B. Yan, H. Ma, N. Li and M.Ye, *Nano Res.* 2011, **4**, 795.
4. Victor Chabot,B.Kim, B.Sloper,C. Tzoganakis and A.Yu, *Scientific Reports* 2013,**3**,1.
